# Supplementary material
Source: publisher site journal article supplement (https://www.spandidos-publications.com/5335/downloadSupplementary)

Figure S1. Proof of transfection success. (A) RT-qPCR of BMP9 expression in C3H10T1/2 cells transfected with AdGFP vs. AdBMP9 in titers of MOI 10, MOI 15, and MOI 20 at 48 h. (B) Western blot of p53 level in C3H10T1/2 cells transfected with AdGFP vs. Adp53 in titers of MOI 15 at 48 h. (C) Western blot of p53 level in C3H10T1/2 cells transfected with AdGFP vs. AdTGF- $\beta$ 1 in titers of MOI 15 at 48 h. \* $P < 0.05$  vs. AdGFP. MOI, multiplicity of infection. RT-qPCR, reverse transcription-quantitative PCR.

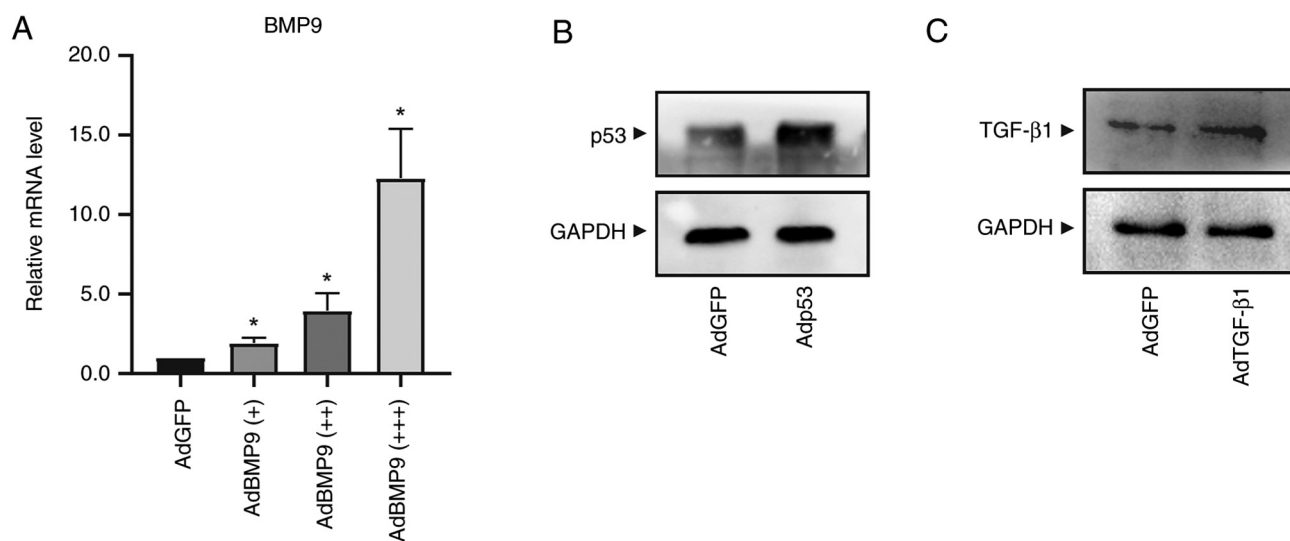

Supplement: Supplementary file 1 [file downloadSupplementary]
